# Supplementary material
Source: PubMed Central journal article supplement (PMC9550527)
Supplement: mmc1.pdf [file mmc1.pdf]

**A**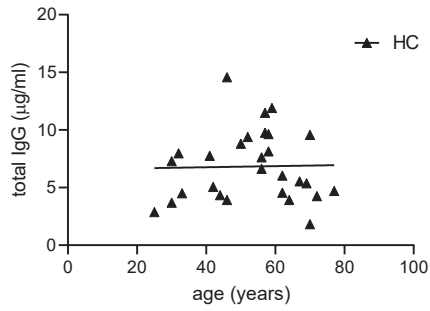

|                         |                   |
|-------------------------|-------------------|
| Spearman r              |                   |
| r                       | 0.01863           |
| 95% confidence interval | -0.3670 to 0.3988 |
| P (two-tailed)          | 0.9250            |

**B**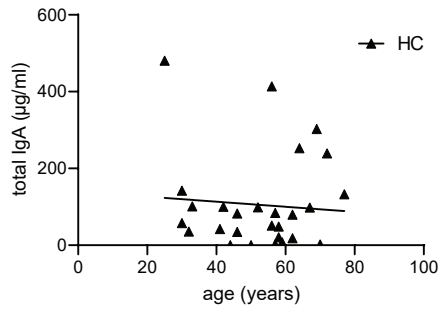

|                         |                   |
|-------------------------|-------------------|
| Spearman r              |                   |
| r                       | -0.05287          |
| 95% confidence interval | -0.4272 to 0.3370 |
| P (two-tailed)          | 0.7893            |

**Figure S1. Salivary antibodies in healthy volunteers.**

Correlation between total salivary IgG (A) and IgA (B) and age in healthy volunteers. Correlation analysis was performed using Spearman rank correlation.

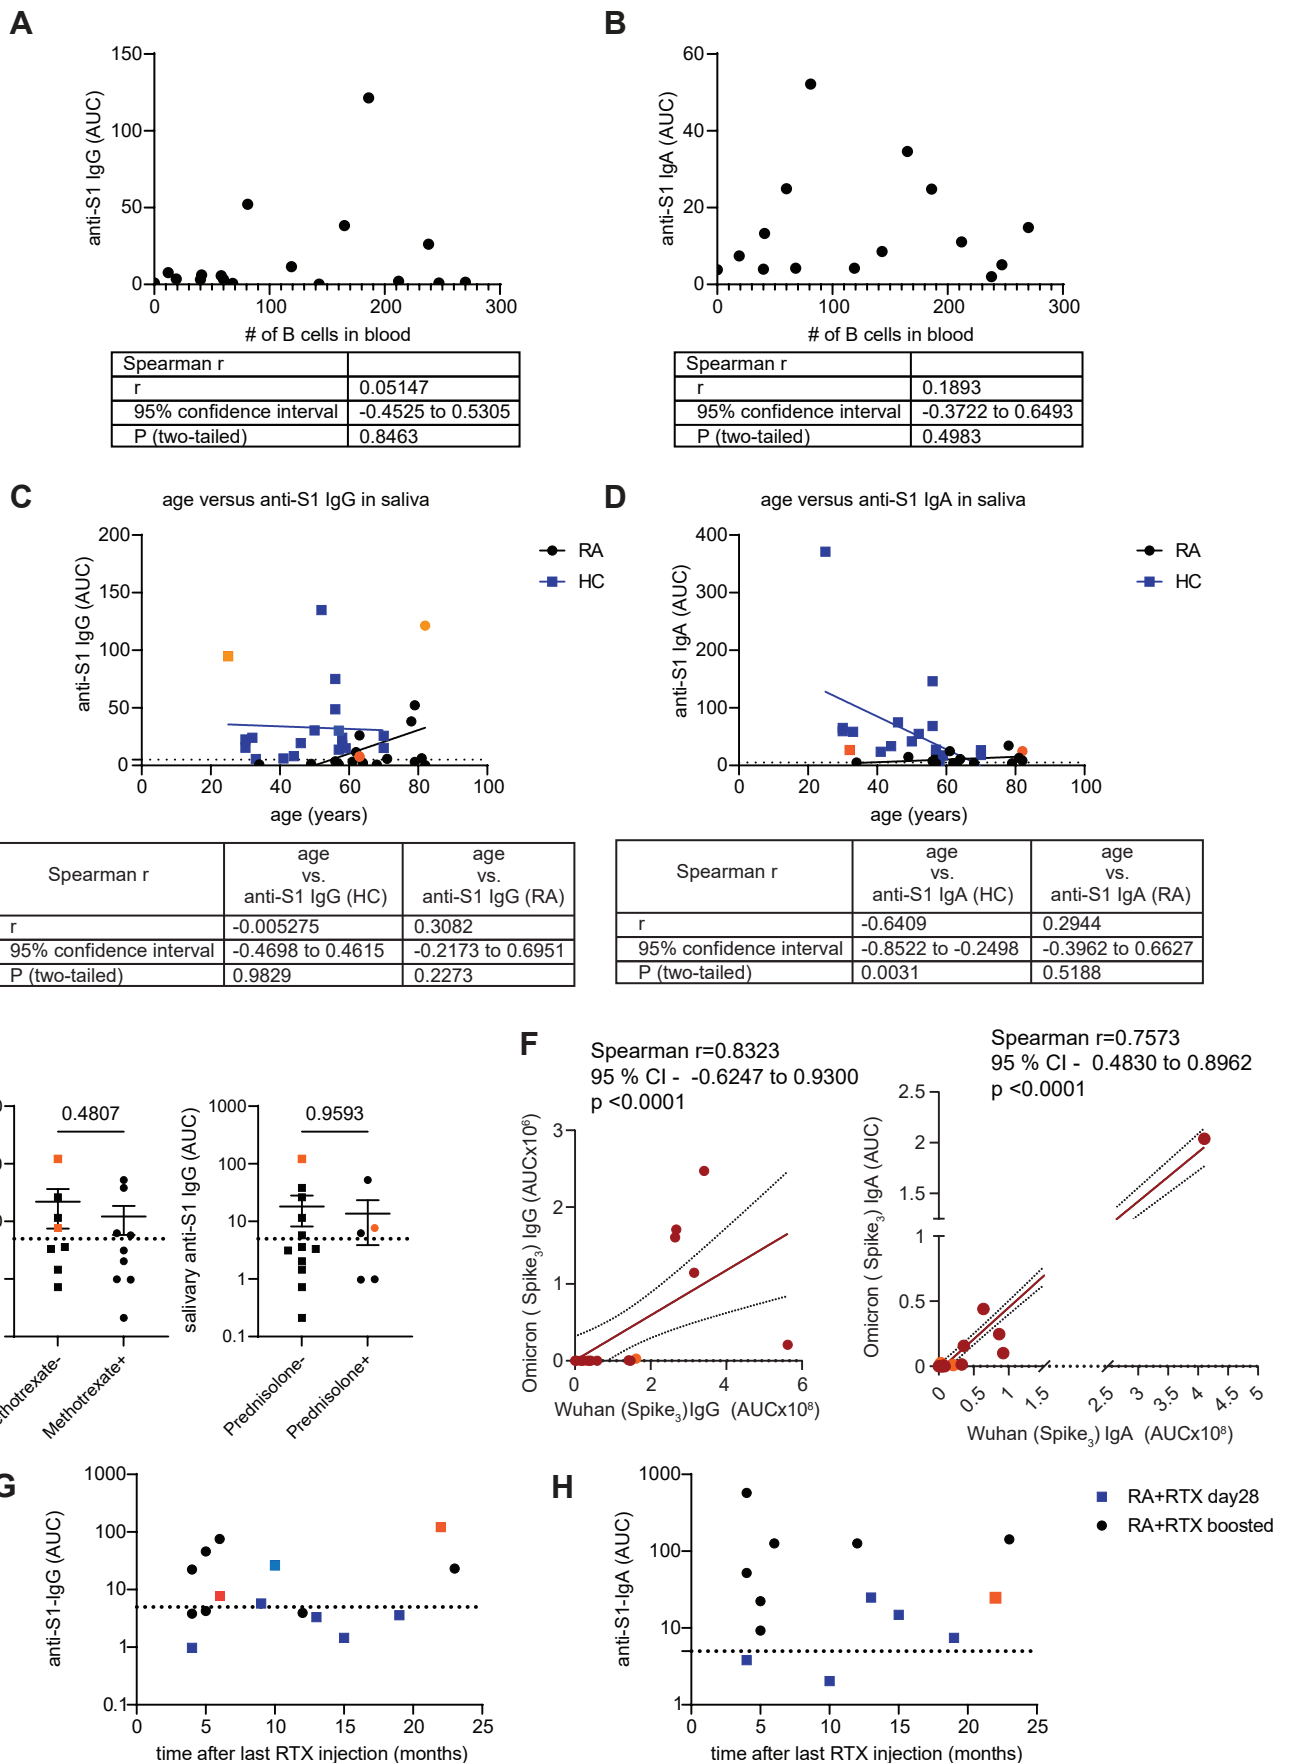

**Figure S2. Salivary anti-Spike responses in RA patients upon vaccination against SARS-CoV-2.**

Correlation between salivary anti-S1 IgG (A) and anti-S1 IgA (B) titers and B cells numbers in the blood on the 28 day after vaccination. Correlation between salivary anti-S1 IgG (C) and anti-S1 IgA (D) titers and age on the 28 day after vaccination. (E) Anti-Spike S1 IgG in saliva at day 28 of vaccination in RA patients according to the treatment. AUC - area under curve. (F) Correlation between IgG and IgA antibody titers for Wuhan or Omicron variants of Spike trimeric protein in RA patients after third vaccination. Correlation between salivary anti-S1 IgG (G) and anti-S1 IgA (H) titers and months after last RTX injection in RA patients. Previously infected individuals are shown in orange. Correlation analysis was performed using Spearman rank correlation. \* -  $p < 0,05$ ; \*\* -  $p < 0,01$ ; \*\*\* -  $p < 0,001$ ; \*\*\*\* -  $p < 0,0001$ .
